# Supplementary material
Source: HighWire-hosted journal article supplement (https://www.cmajopen.ca/highwire/filestream/81019/field_highwire_adjunct_files/0/open-2016-0001-1-at.pdf)
Supplement: open-2016-0001-1-at.pdf [file open-2016-0001-1-at.pdf]

## **Appendix 1 (as supplied by the authors): Preliminary research agreement**

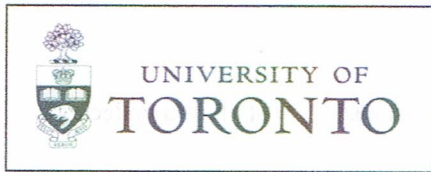

## **Appendix A: Research Agreement for the project:**

### **Northern Perspectives of medical elective tourism: Creating a curriculum for medical students and residents traveling to Northern communities**

Research, Data, Statistics, and Publication Agreement Between

***Waasegiizhig Nanaandawe'iyewigamig (WNHAC)***

and

***the Primary Investigators of this research project, including the Core Collaborator Group***

#### **Purpose of Agreement:**

This research agreement will ensure the project "*Northern Perspectives of medical elective tourism: creating a curriculum for medical students and residents traveling to Northern communities*" is respectful to the cultures, languages, knowledge, and values of the Aboriginal Community in Kenora as represented by the **WNHAC**. This agreement respects that the Aboriginal community has a right to self-determined data management and governance. The agreement acknowledges the desire of Dr. Sarah Coke to conduct collaborative research by involving community representatives as active research team members in all aspects of this project.

#### **Agreement Principals:**

- Maintaining mutual respect and accountability between the parties
- Recognize the complementary and distinct expertise, responsibilities, mandates, and accountability structures of each party
- Ensure the highest standards of research ethics, including the acknowledgement of **WNHAC** specific principles of self-determined data management
- Respect the individual and collective privacy rights of **WNHAC** staff
- Recognize the value and potential of research that is scientifically and culturally validated

**Ownership:**

- The principle investigators acknowledge that the **WNHAC** is the rightful custodian of all data collected from *Aboriginal clients*
- *Both parties respect that the individual interviewee (including Aboriginal interviewees) is the rightful owner of all data collected through the interview process*

**Collaboration:**

- The **WNHAC** agrees to undertake the research roles, responsibilities and activities described as part of the collaborative research methods
- The principle investigator agrees to the inclusion of project team representatives from the **WNHAC** as co-investigators

**Access:**

- The principle investigator will be required to protect the data from unauthorized use and act as stewards on behalf of the rightful owner, *the Aboriginal person*
- The **WNHAC** has provided prior consent to Dr. Sarah Coke to maintain a copy of the data generated by this project in accordance with the study protocol reviewed and approved by the Research Ethics Board for the purpose of qualitative research

**Possession:**

- The principle investigators will provide the **WNHAC** the opportunity for review of any research reports before the submission of reports for publication
- The representatives from the **WNHAC**, upon their review, will be co-investigators on any and all publications, reports, documents, or other material and or presentations from which this data is utilized

This agreement will be signed by both parties in person when the primary investigator is in Kenora. Copies collectively bearing the signatures of all parties shall constitute the fully executed agreement.

Signature:



(Anita Cameron, Executive Director WNHAC)

Signature:



(Sarah Coke, primary investigator)
